# Supplementary material for: Metal organic chemical vapour deposition (MOCVD) of bone mineral like carbonated hydroxyapatite coatingsElectronic supplementary information (ESI) available: experimental data. See http://www.rsc.org/suppdata/cc/b3/b312855p/
Source: Royal Society of Chemistry journal article supplement (doi:10.1039/b312855p), 2004-01-01
Supplement: b312855p.doc [file b312855p.doc]

# *Supplementary Information*

Argon

Cold wall reactor

Heated Zone

Ca(hffpd)2

TBP

Exhaust

- Flow regulator

Sample

- Bubblers

Mixer

Schematic of MOCVD rig

Argon

Cold wall reactor

Heated Zone

Ca(hffpd)2

TBP

Exhaust

- Flow regulator

Sample

- Bubblers

Mixer


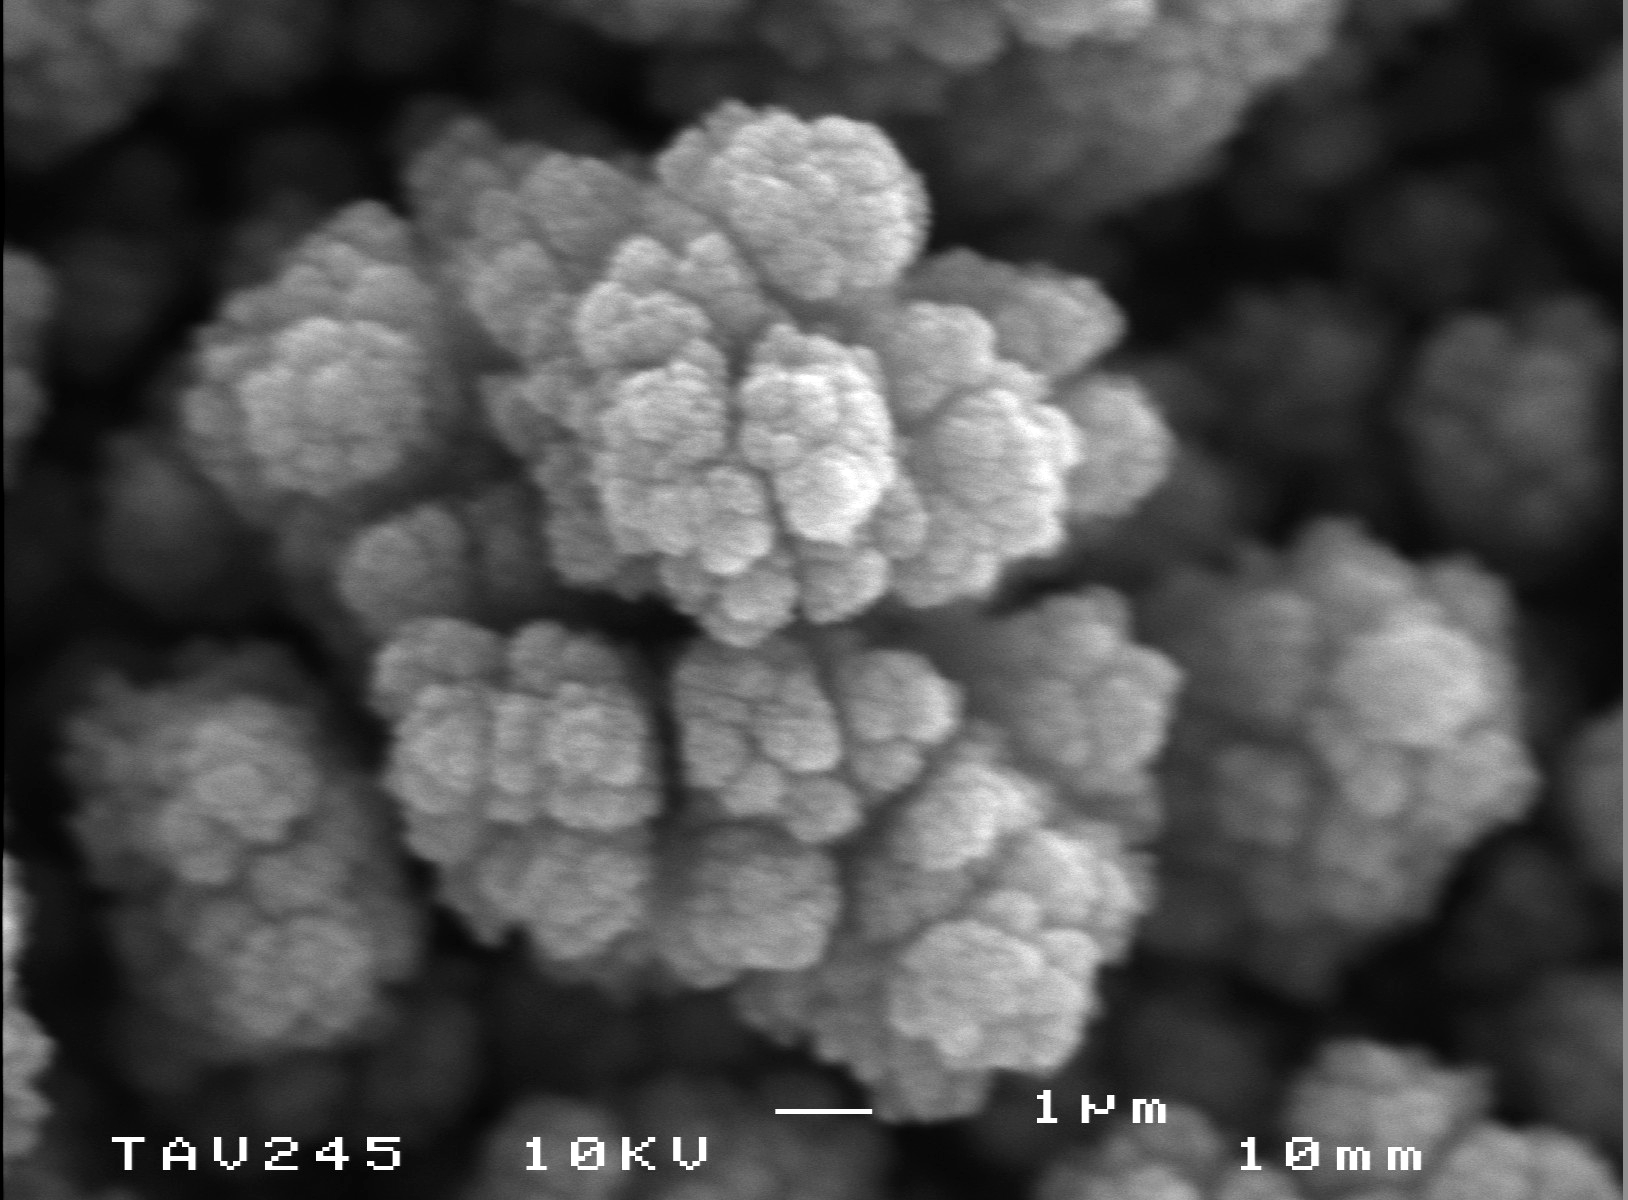


**Fig 1c** SEM image of sintered specimen at low magnification

**Fig 2** SEM image of unsintered specimen at low magnification


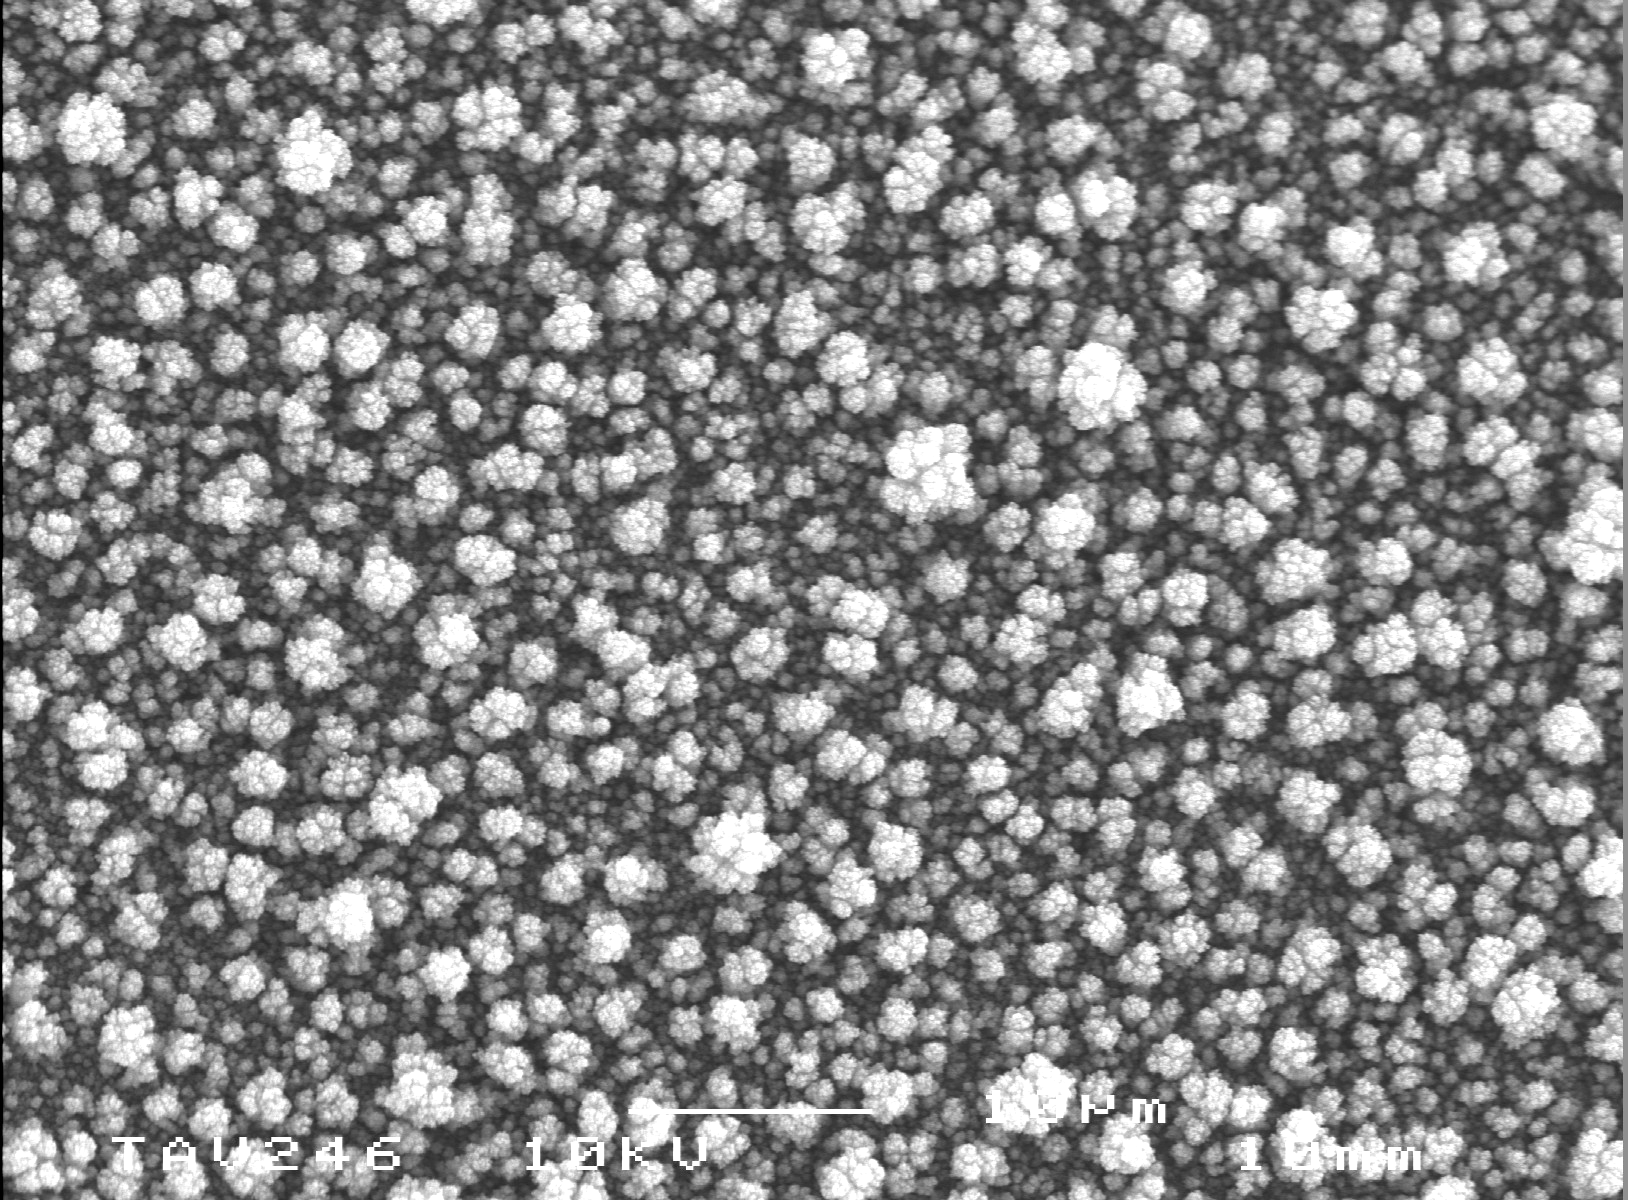


**Fig 1a** SEM image of unsintered specimen at low magnification

**Fig 2** SEM image of unsintered specimen at low magnification


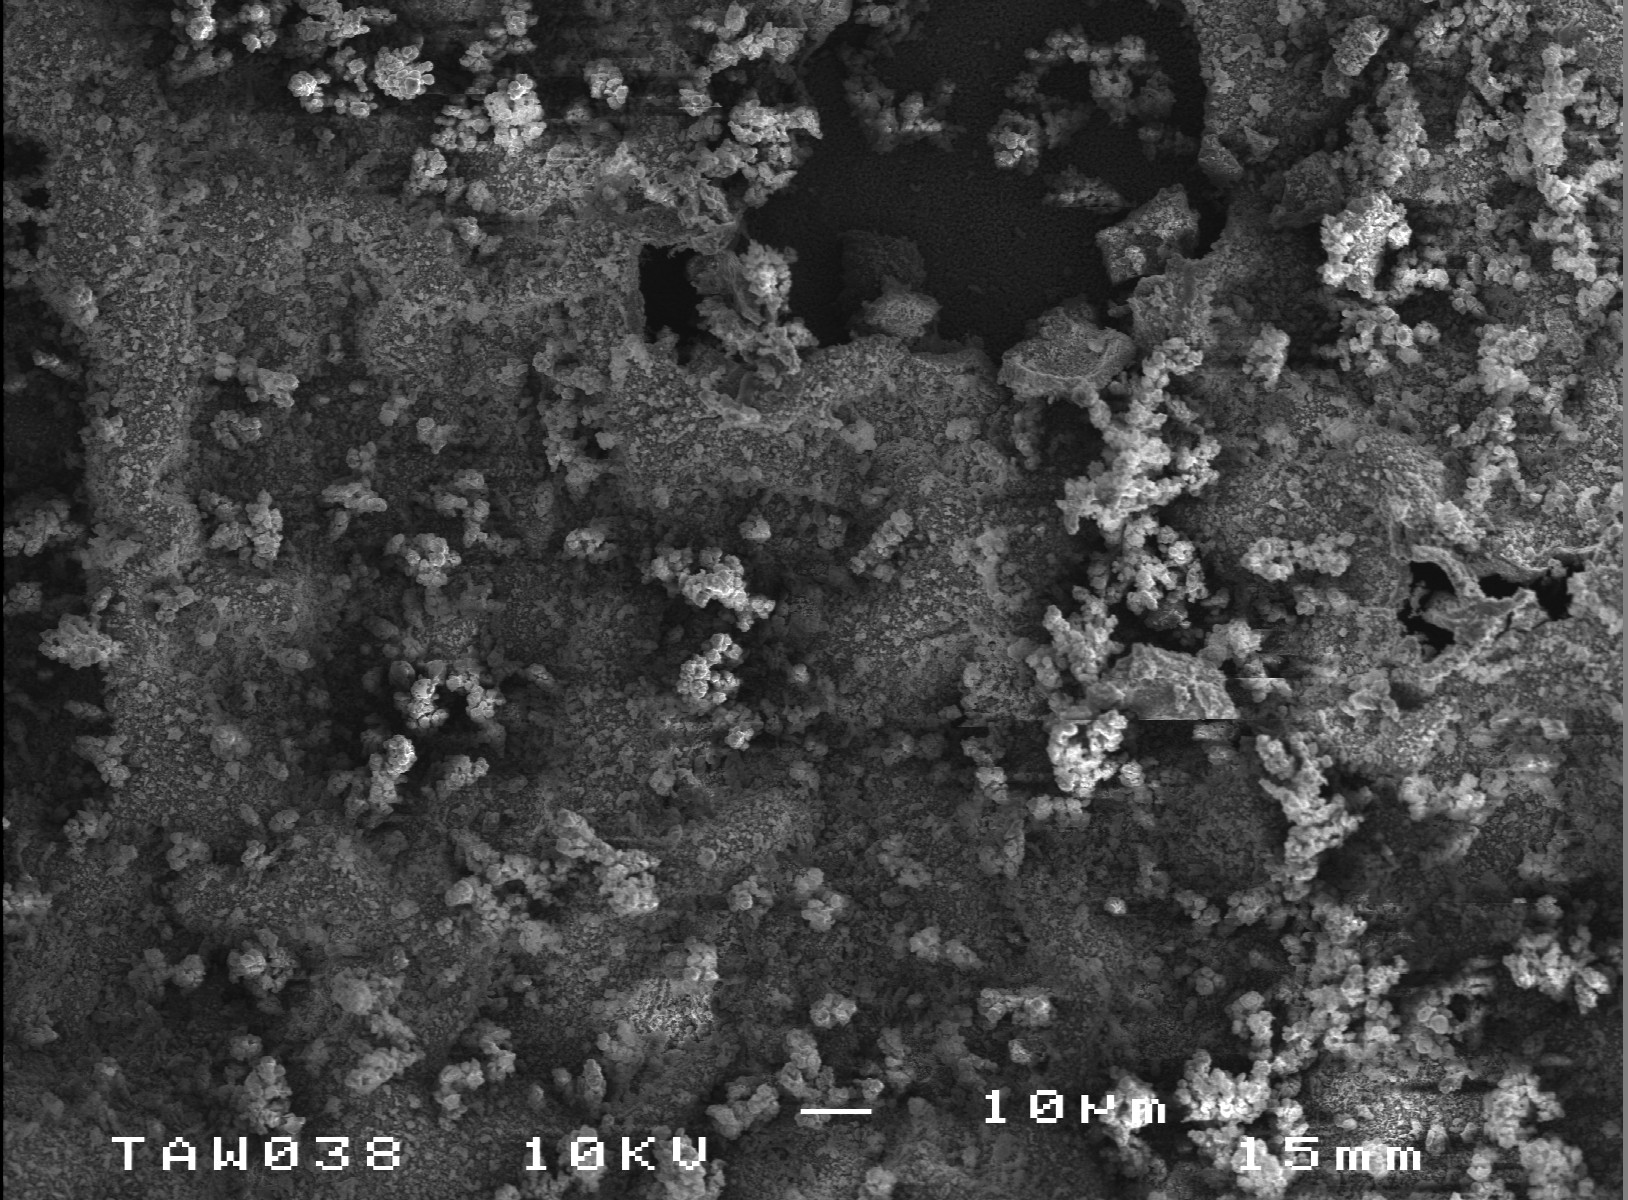


**Fig. 1b** SEM image of unsintered specimen at high magnification (x1000)

**Fig. 3** SEM image of unsintered specimen at high magnification (x1000)


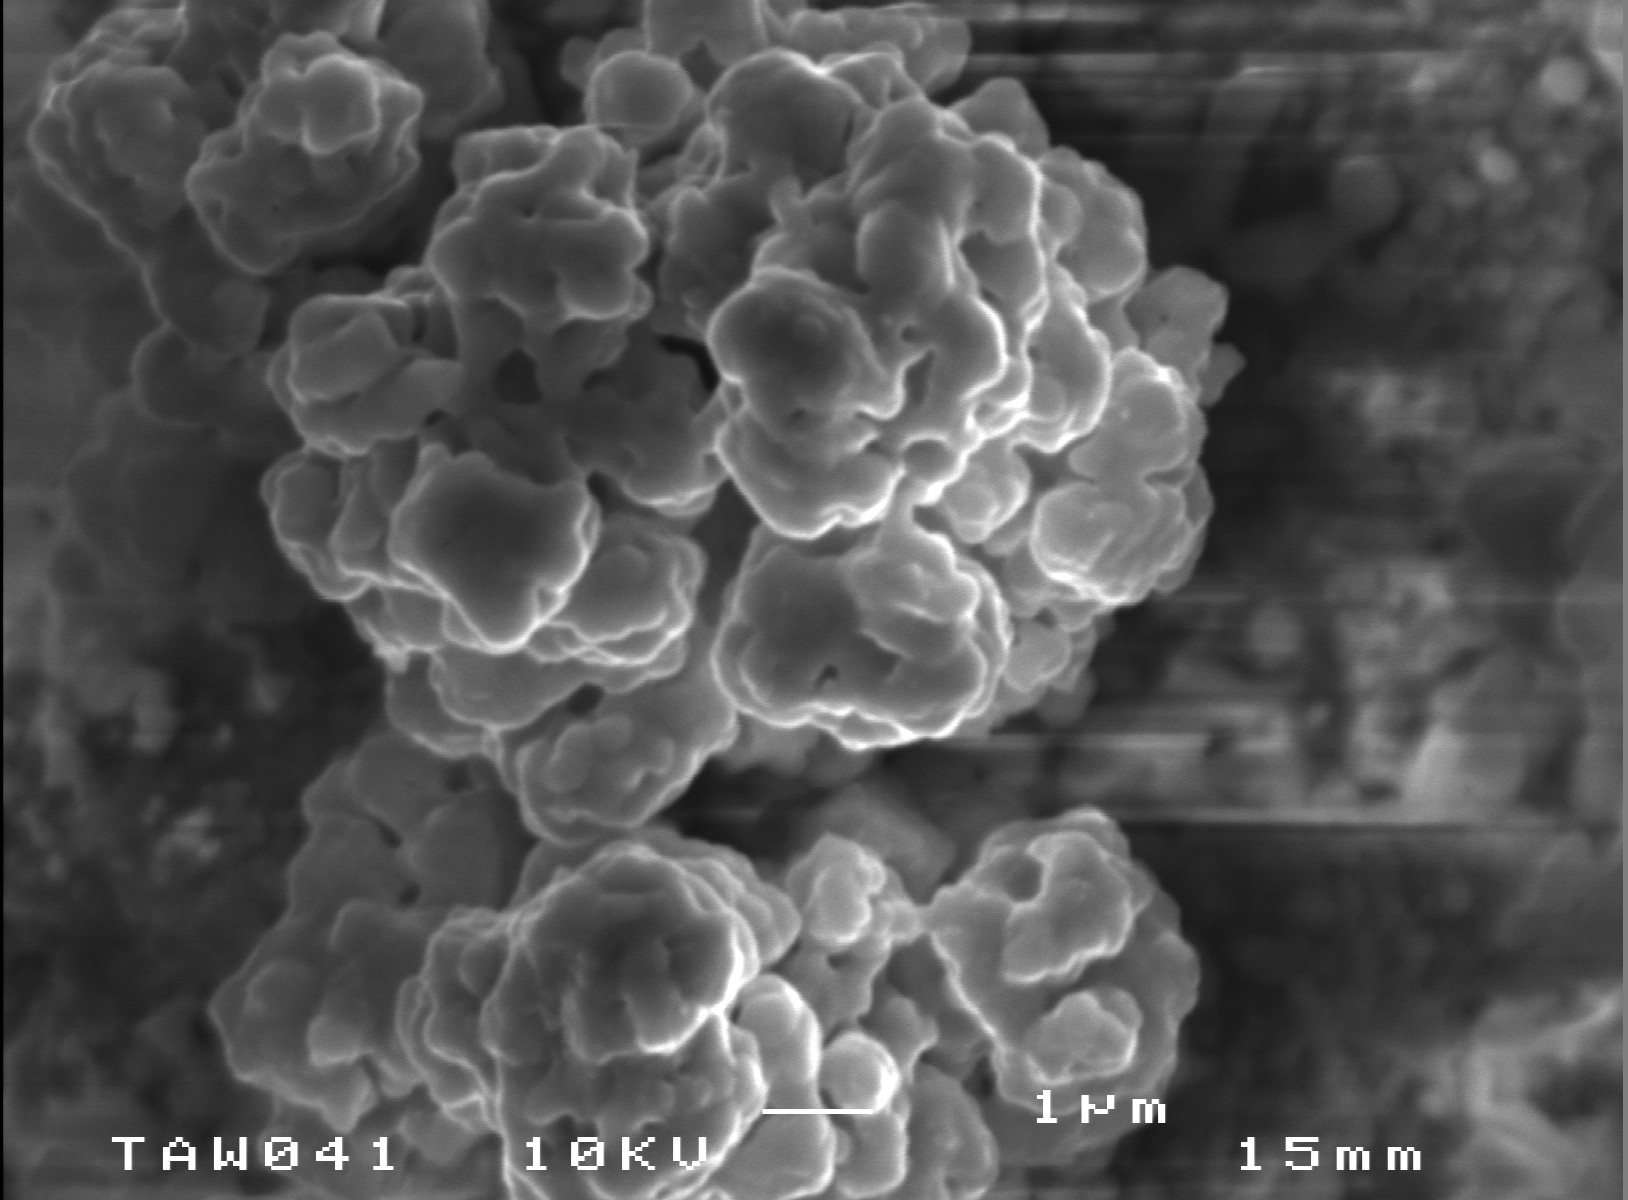


**Fig. 1d** SEM image of sintered specimen at high magnification (x1000)

**Table 1** FT-Raman peaks for sintered specimen, human femur, calcium carbonate and carbonated apatite

| Peak Assignment  (cm-1) | Sintered Ca/P specimen | Human  Femur | Synthetic  Hydroxyapatite | Synthetic Carbonated Apatite | Calcium Carbonate  **(standard spectra)** |
| --- | --- | --- | --- | --- | --- |
| CH stretch  Amide Band I  CO32-  CO32-  C-H (bend)  Amide Band II  C-O  CO32-  CO32- (bend)  PO43- (symmetric stretch)  PO43- (asymmetric stretch) CO32- (bend)  PO43- (bend)  PO43- (bend) | 3000 - 2800  -  -  -  -  -  -  -  -  953  786  702  -  444 | 3000 – 2900  1636  -  -  1450  1262  1242  1062  1036  952  -  -  584  429 | -  -  -  1578 - 1507  -  -  -  -  -  952  774, 690  -  -  436 | -  -  -  -  -  -  -  1078  -  946  -  -  595  438, 454 | -  -  1747  1434  -  -  -  1084  -  -  -  710  -  - |

*a* Footnote text.

**Table 2** FTIR peaks for sintered specimen, carbonated apatite (IRC) and commercial HA

| ***Peak Assignment***  ***HA (cm-1)*** | ***Sintered Ca/P specimen*** | ***Commercial HA***  ***Merck*** | ***Carbonated apatite*** |
| --- | --- | --- | --- |
| Hydroxyl stretch  Carbonate v3  - (m)  - (m)  - (m)  - (w)  Phosphate v3  - (vs)  - (vs)  Phosphate v1 (m)  Carbonate v2 (m)  Phosphate v4 (m)  - (m)  - (vs)  - (vs)  Phosphate v2 (w) | 3538  -  -  -  1417  -  1200 - 966  1096  1044  982  860  -  -  605  555  - | 3570  1650 – 1300  1648  1455  1417  -  1190 – 976  1091  1042  962  877  660 - 520  632  602  566  472 | 3571  1650 – 1300  1650  1454  1417  1321  1190 – 976  -  1041  961  873  660 - 520  629  603  567  469 |

*a* Footnote text.


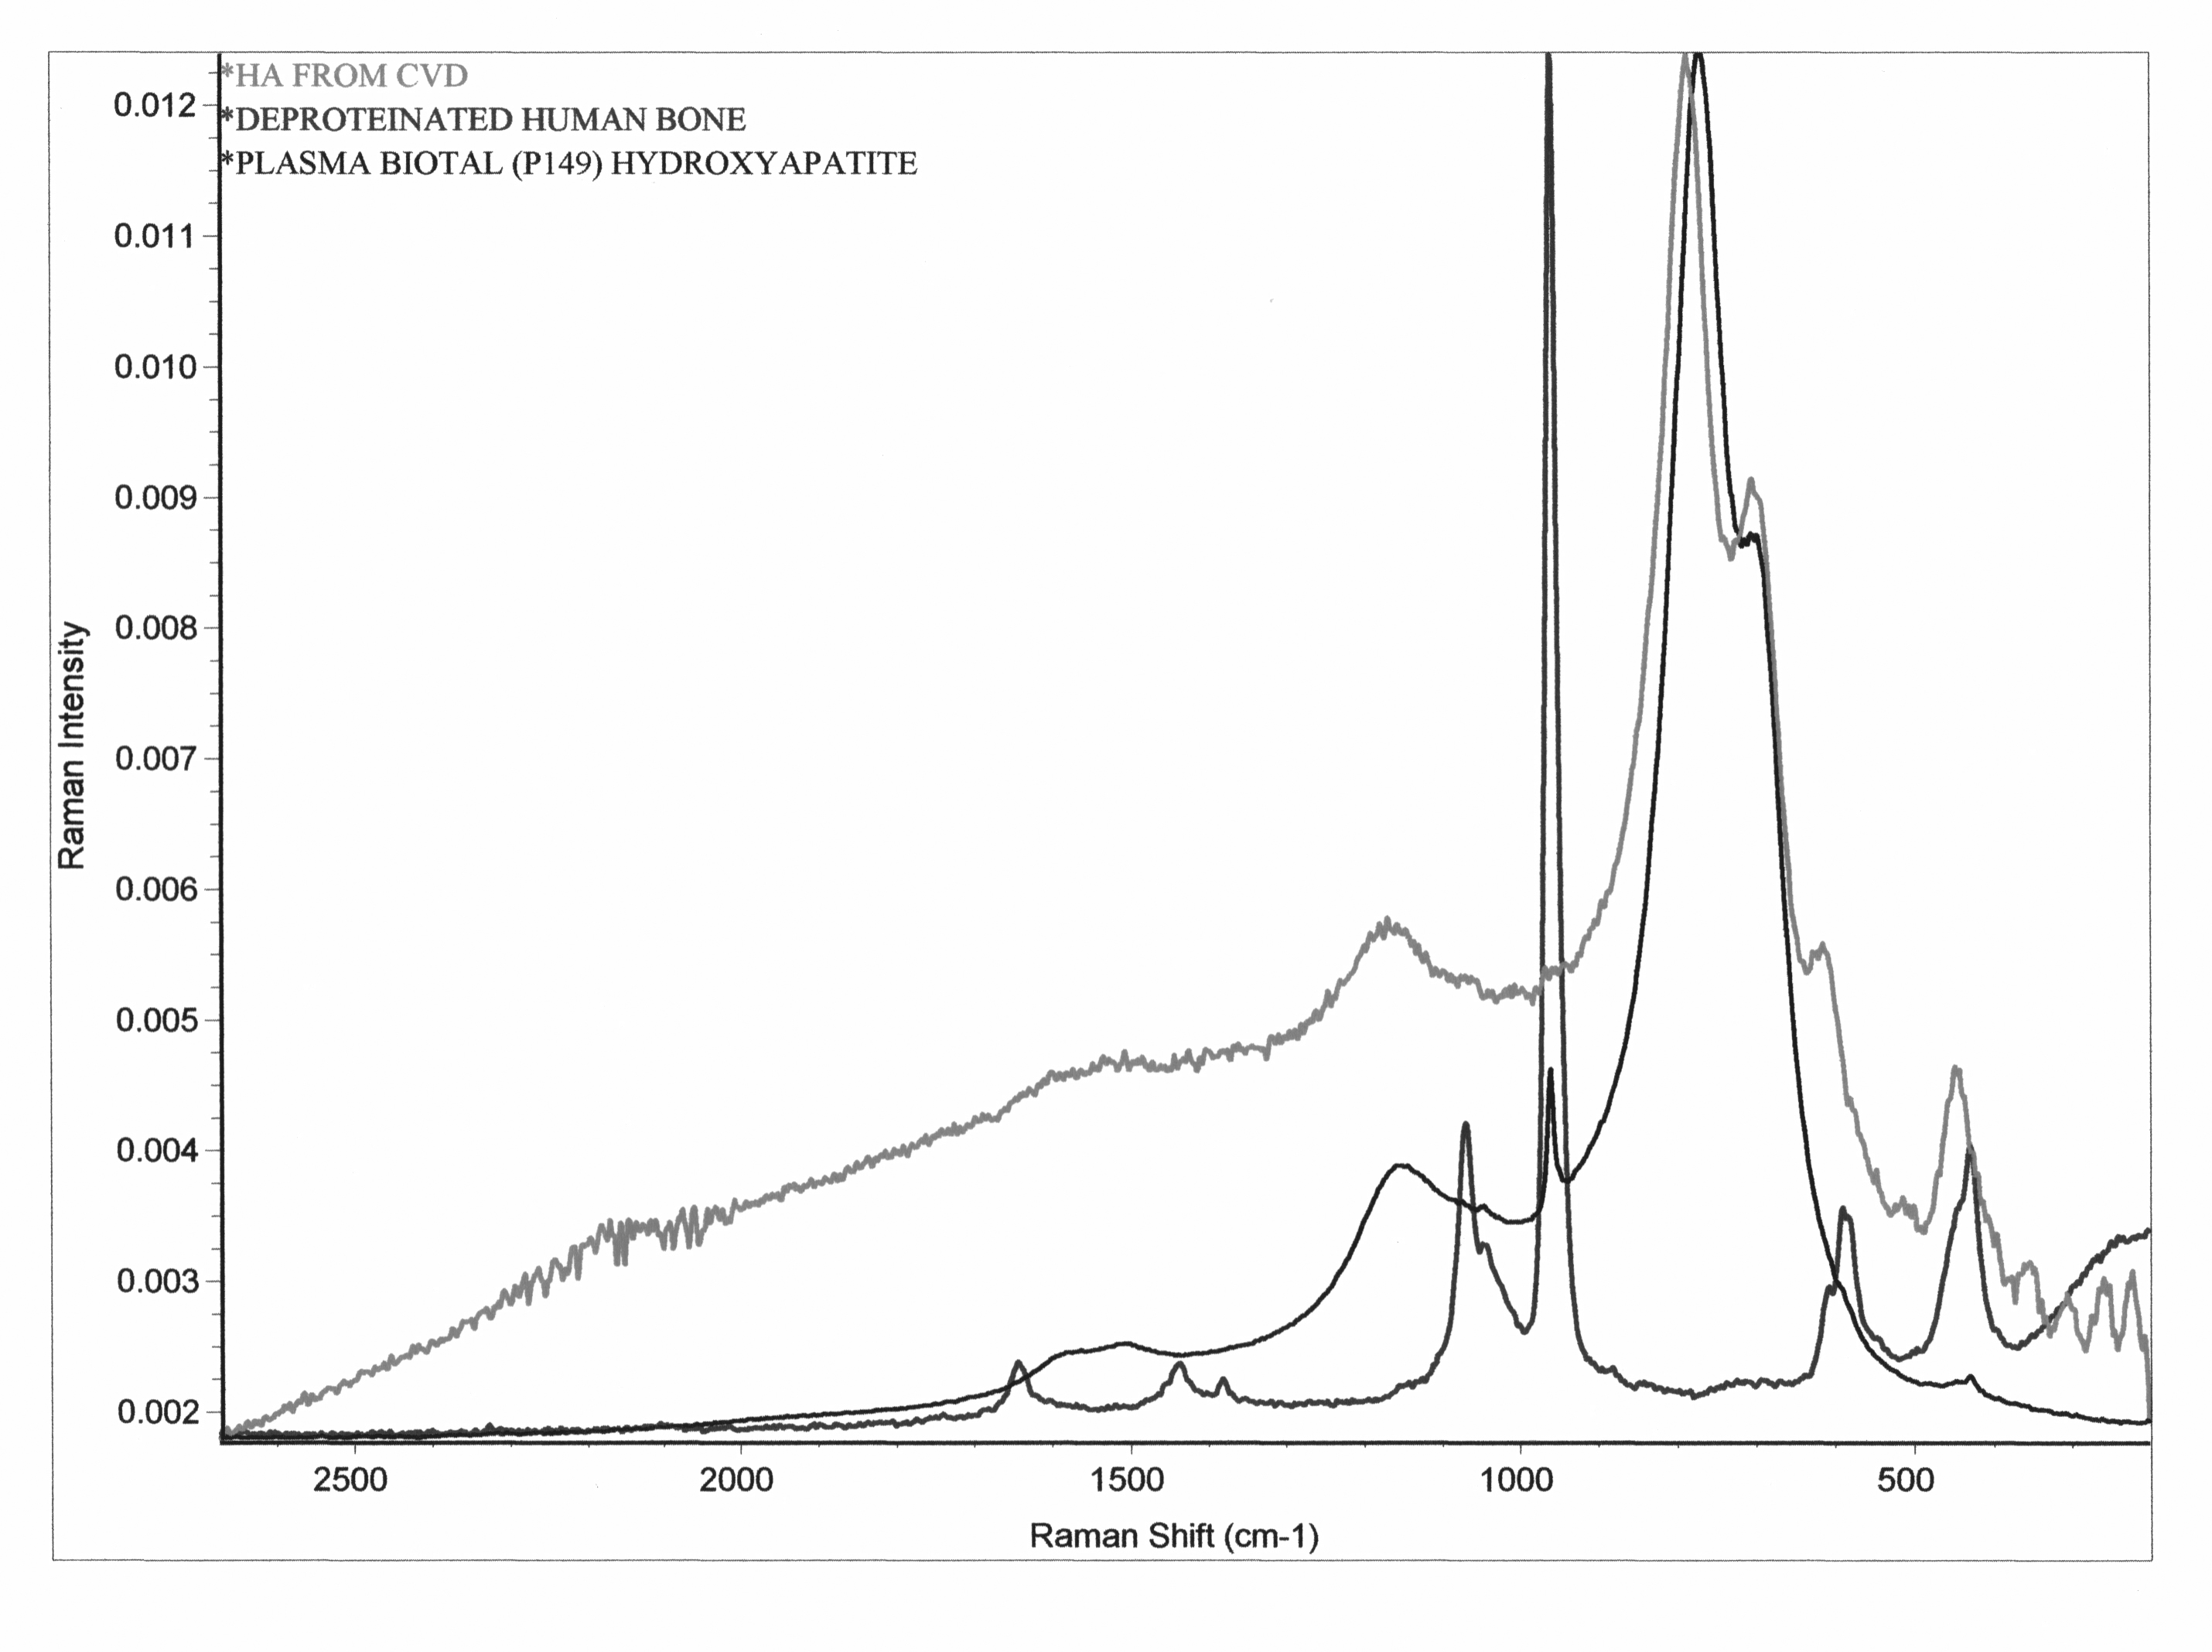


*a*

*b*

*c*

**Fig.2** Raman spectrum for (*a*) sintered CVD coating, (*b*) deproteinated human bone mineral and (*c*) commercial HA (Plasma Biotol P120)

**Fig 2** SEM image of unsintered specimen at low magnification


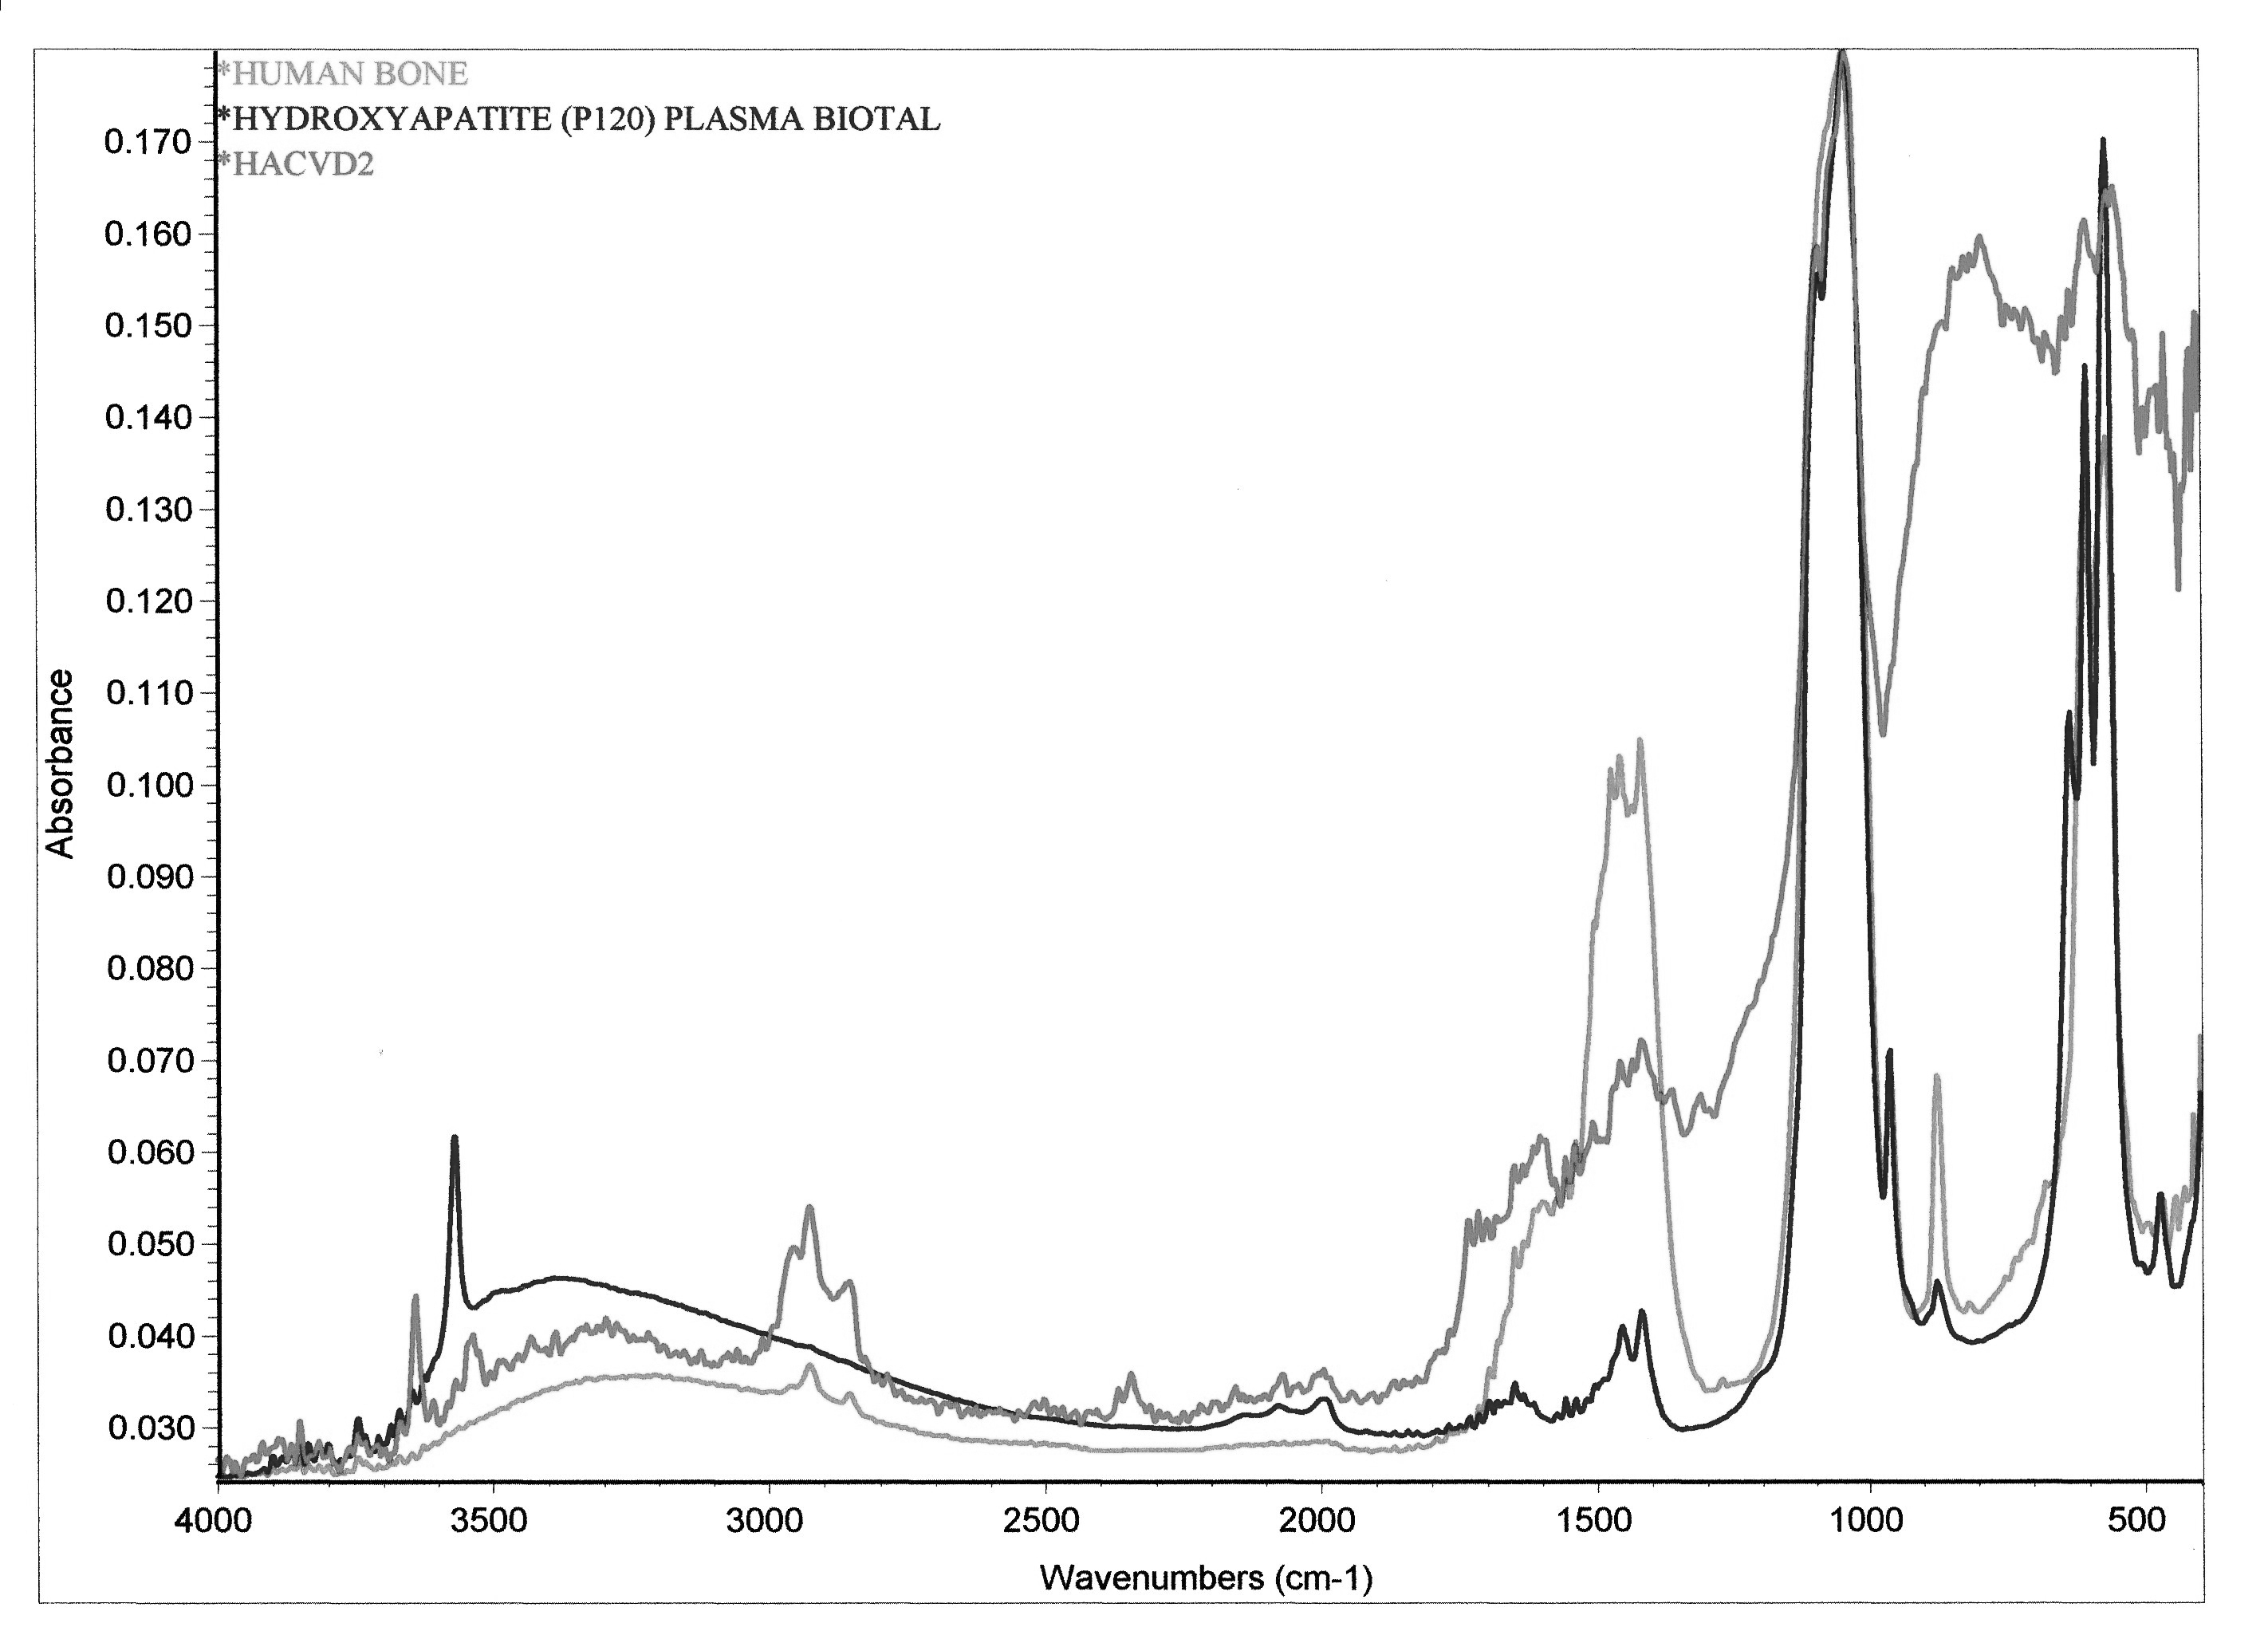


*a*

*c*

*b*

**Fig. 3** FTIR spectrum of (*a*) sintered CVD coating, (*b*) deproteinated human bone mineral and (*c*) commercial HA (Plasma Biotol P120).

**Fig 2** SEM image of unsintered specimen at low magnification


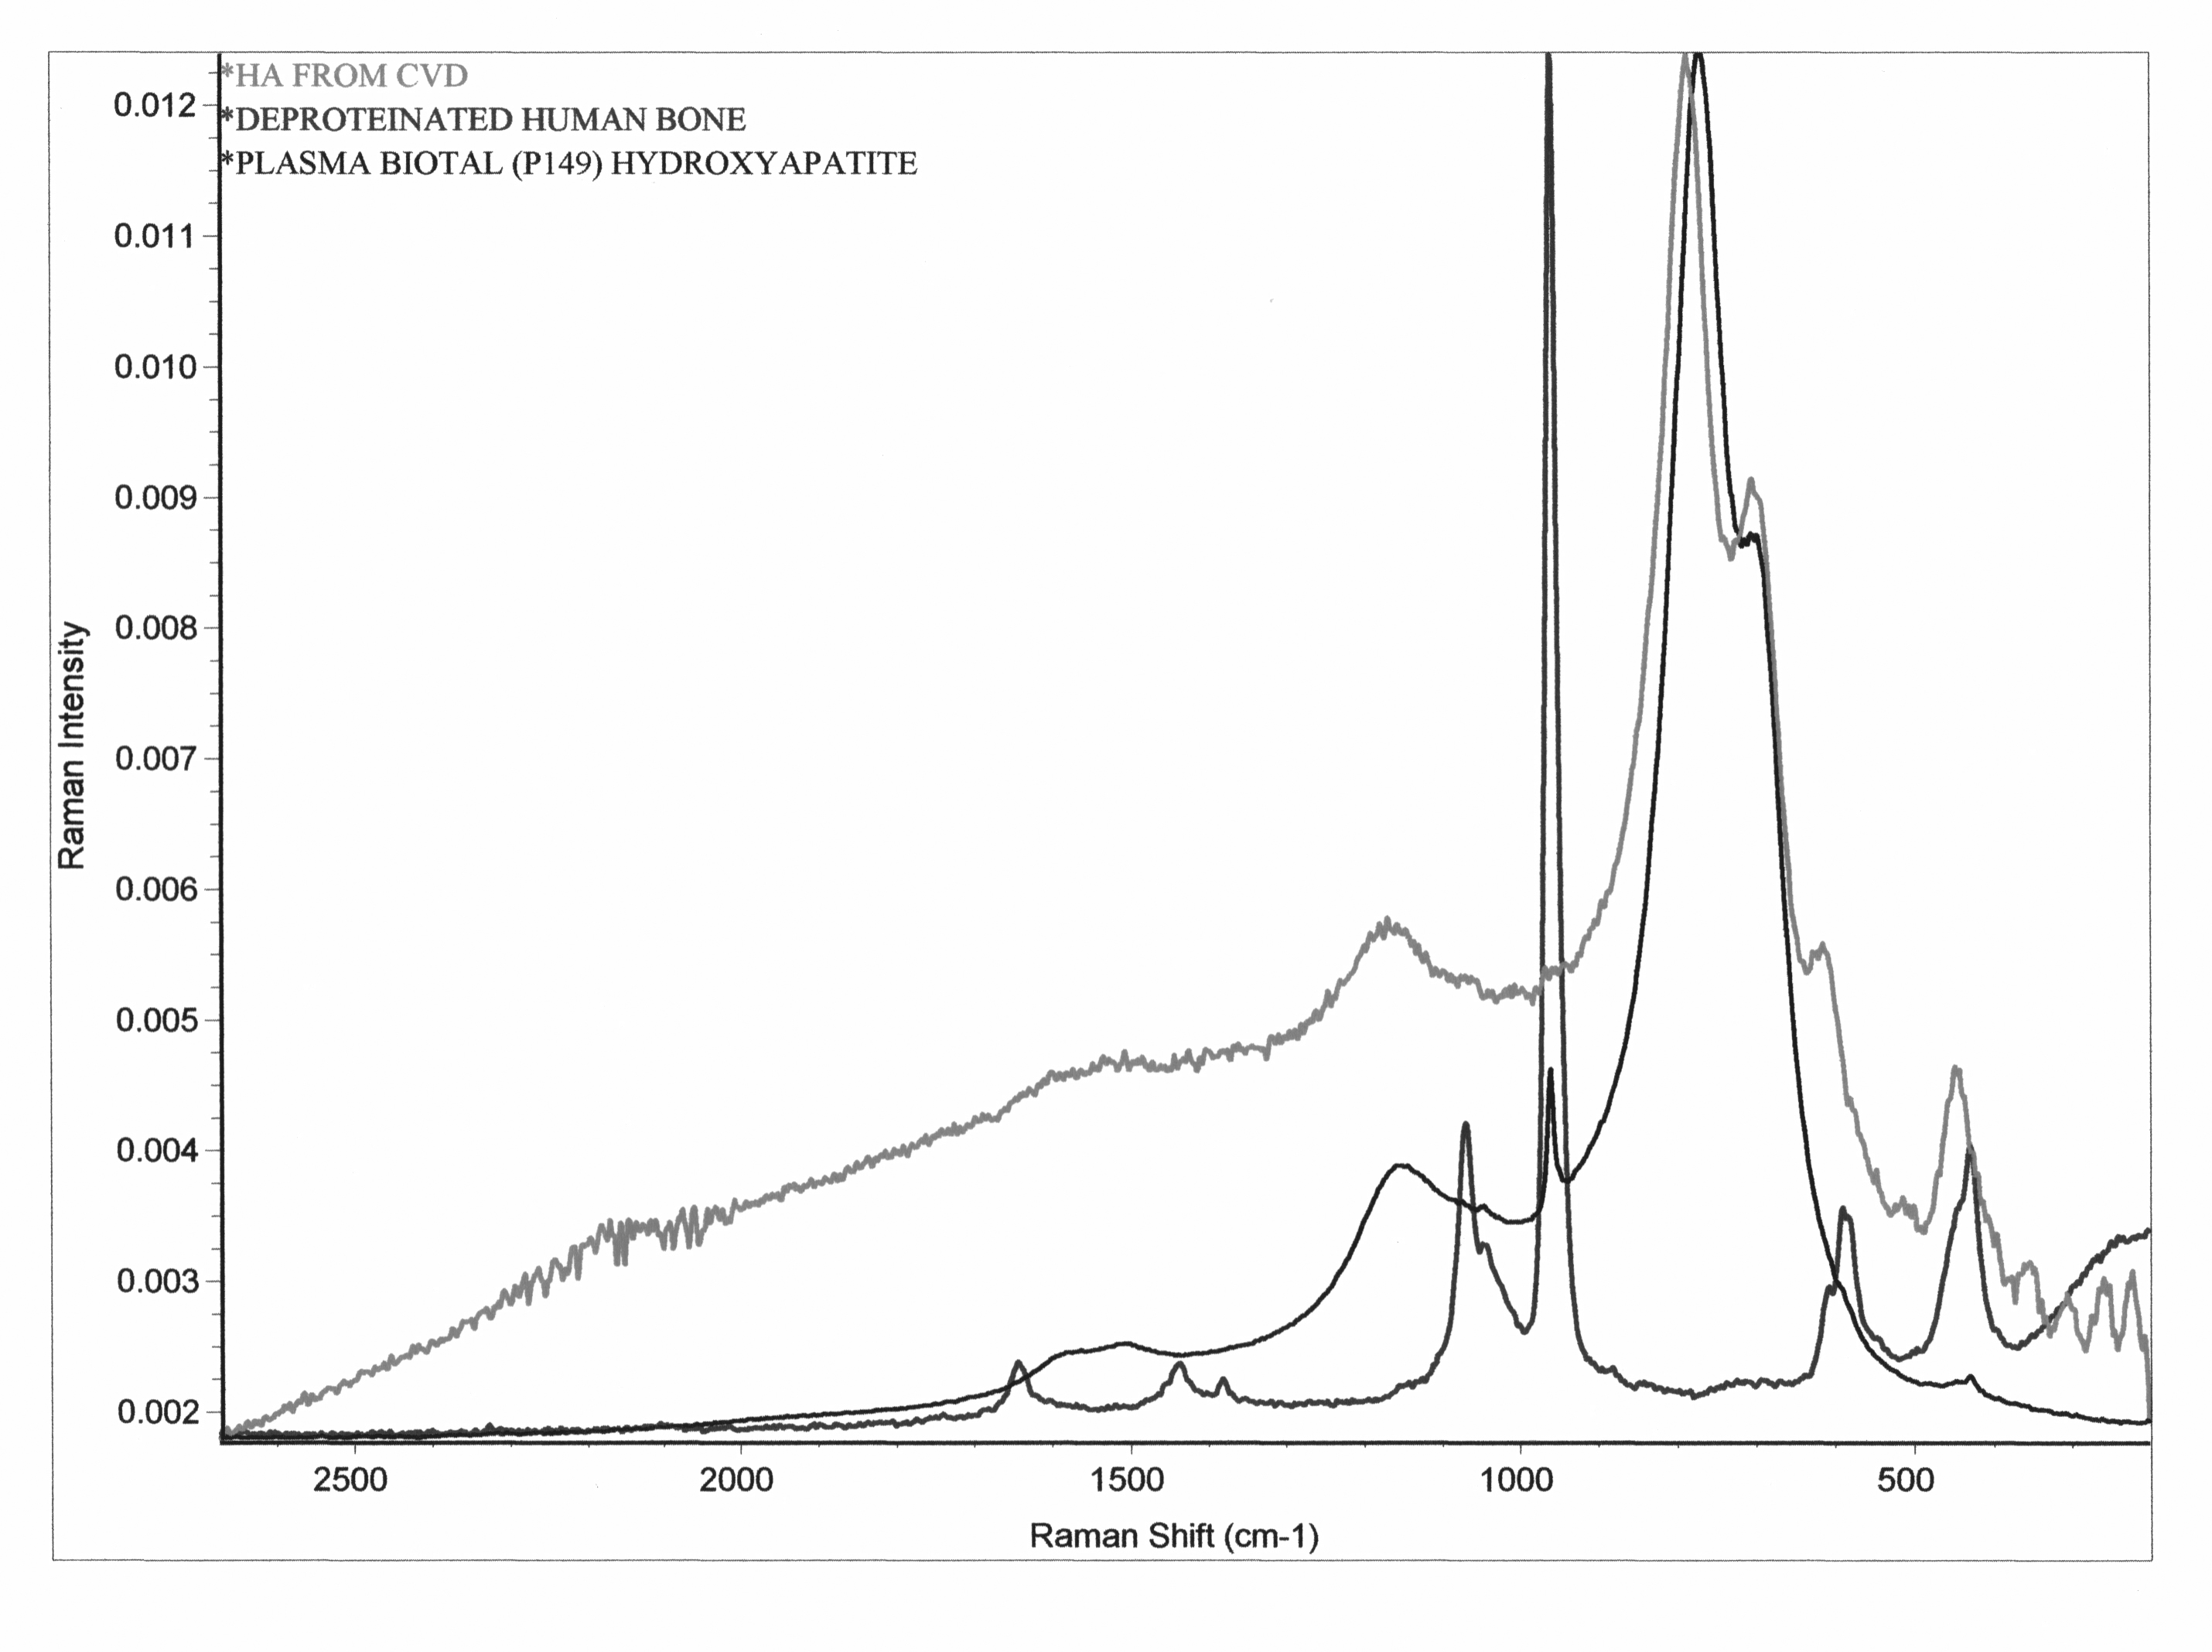


*a*

*b*

*c*


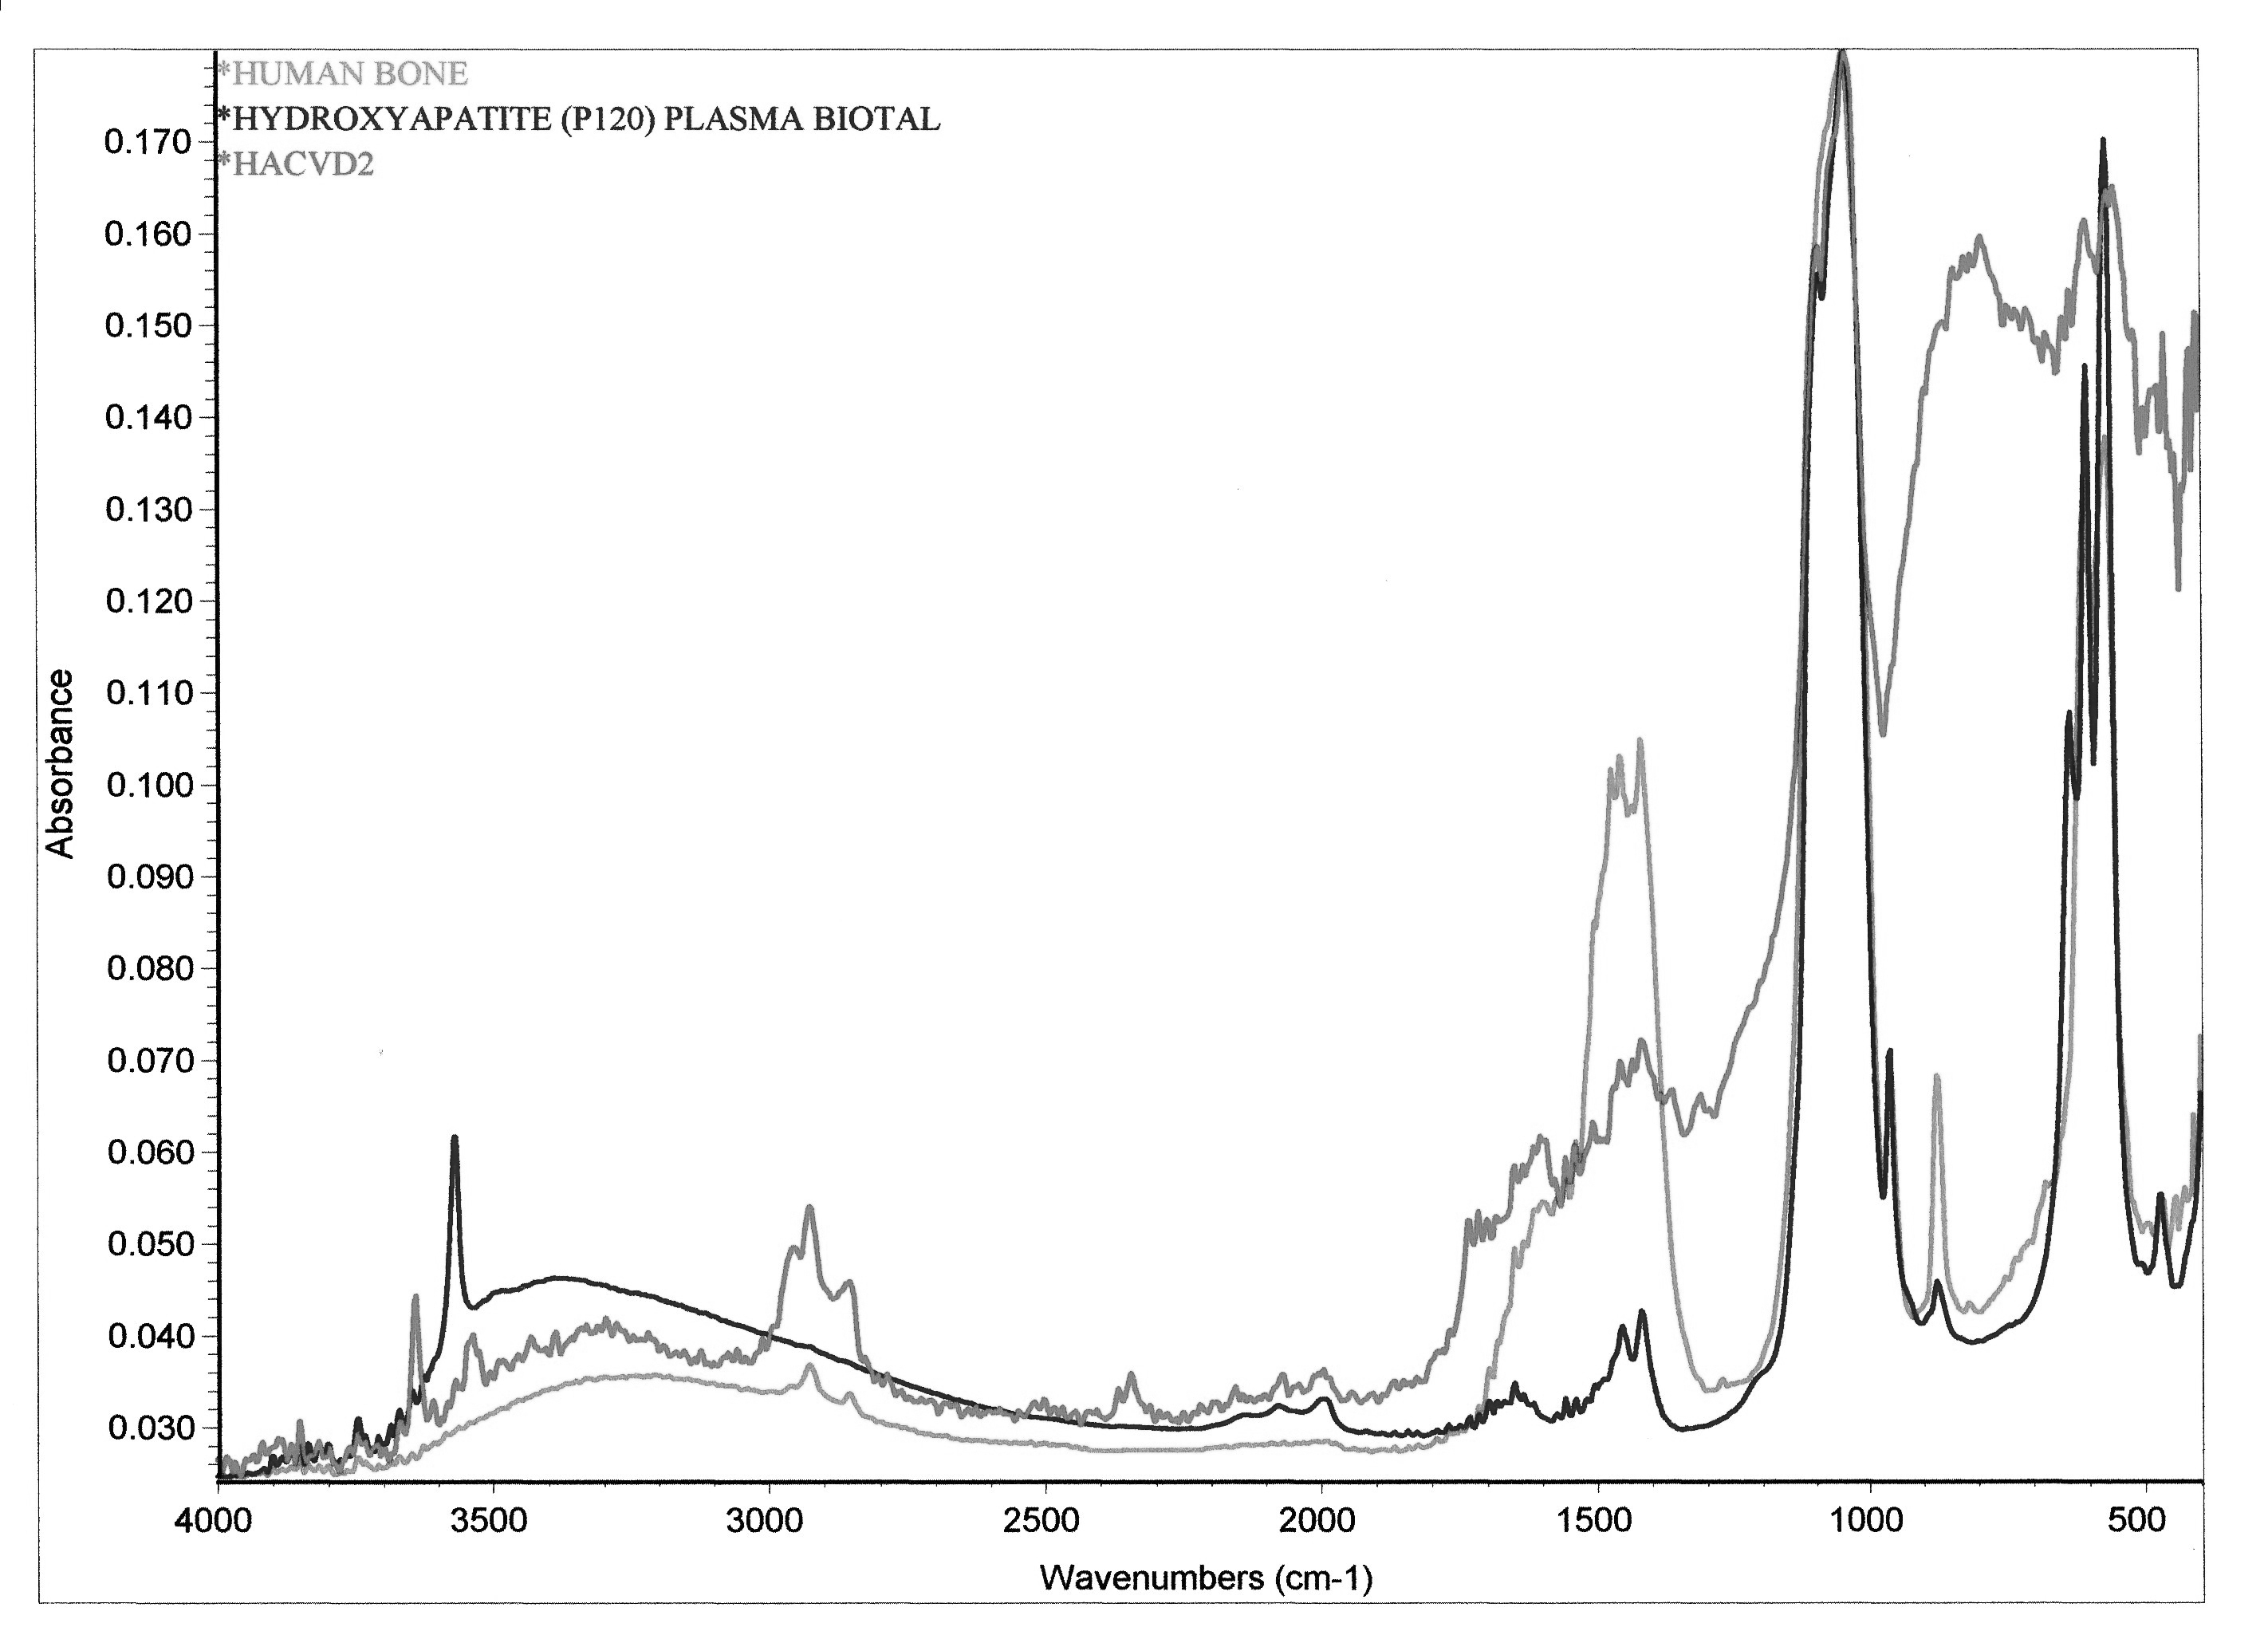


*a*

*c*

*b*

.
